# Supplementary material
Source: PubMed Central journal article supplement (PMC8082094)
Supplement: NIHMS1690436-supplement-1.pdf [file NIHMS1690436-supplement-1.pdf]

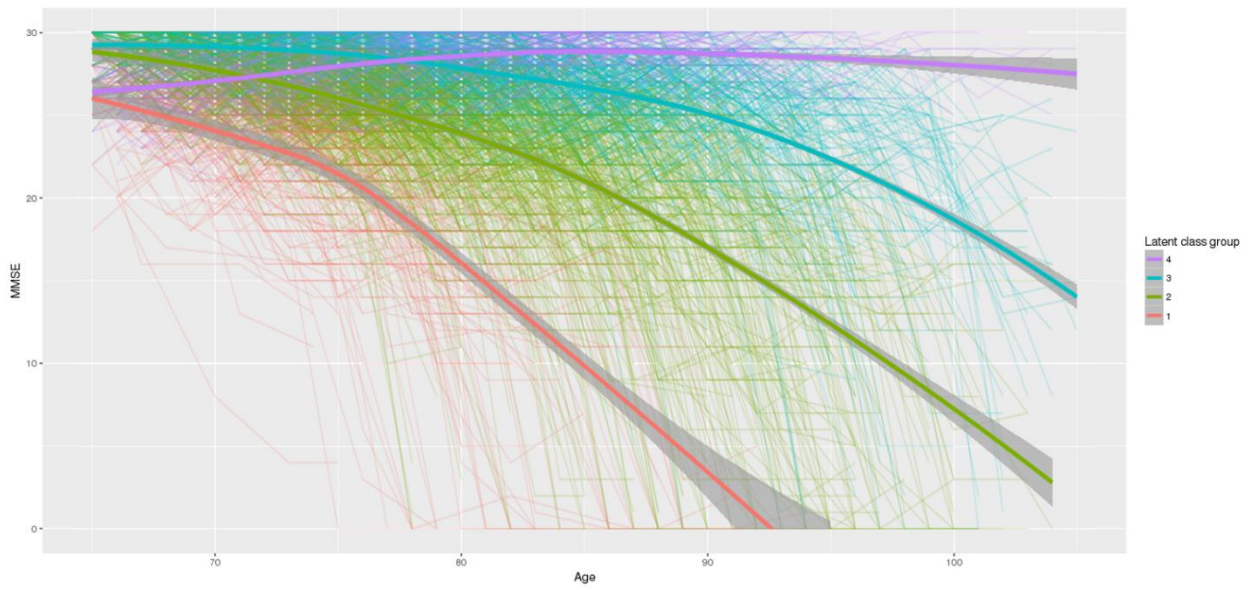

**Figure S1.** Trajectories of cognitive functioning among older adults, without excluding the last time point. The thin lines are the trajectories of each participant. The colored triangles represent the mean scores for their respective latent class group. The thick lines are loess-smoothed, estimated growth trajectories. The gray area enclosing these thick lines represent the standard error.

**Table S1. Fixed effects estimates for the analyses without excluding the last time point**

| <b>Level</b>                        | <b>Class</b>     | <b>Parameter</b> | <b>Estimates</b> | <b>SE</b> |
|-------------------------------------|------------------|------------------|------------------|-----------|
| <u>Class-membership<sup>a</sup></u> |                  |                  |                  |           |
|                                     | Extreme decline  | Intercept        | -.84**           | .27       |
|                                     | Moderate decline | Intercept        | .61**            | .20       |
|                                     | Minimal decline  | Intercept        | .59**            | .22       |
| <u>Trajectory</u>                   |                  |                  |                  |           |
|                                     | Extreme decline  | Intercept        | Not estimated    |           |
|                                     | Moderate decline | Intercept        | .41              | .70       |
|                                     | Minimal decline  | Intercept        | -2.05**          | .76       |
|                                     | No decline       | Intercept        | -9.16***         | .96       |
|                                     | Extreme decline  | Age              | -.14***          | .01       |
|                                     | Moderate decline | Age              | -.12***          | .005      |
|                                     | Minimal decline  | Age              | -.08**           | .005      |
|                                     | No decline       | Age              | -.01             | .20       |

*Note.* SE= Standard error. <sup>a</sup>No decline was used as class of reference. \* $p < .05$ . \*\* $p < .01$ . \*\*\* $p < .001$ .

**Table S2. Descriptive statistics of baseline characteristics**

|                      | <u>Rapid Decline</u> |          | <u>Moderate Decline</u> |        | <u>Minimal Decline</u> |        | <u>No Decline</u> |        | <u>Between-group statistics</u> |  |
|----------------------|----------------------|----------|-------------------------|--------|------------------------|--------|-------------------|--------|---------------------------------|--|
|                      | <i>F</i>             | $\chi^2$ |                         |        |                        |        |                   |        |                                 |  |
| MMSE (SD)            | 23.24                | (3.6)    | 26.35                   | (2.8)  | 28.32                  | (1.9)  | 28.67             | (1.5)  | 280.09***                       |  |
| Age (SD)             | 71.37                | (6.3)    | 73.09                   | (7.2)  | 72.97                  | (7.4)  | 78.53             | (6.2)  | 41.69***                        |  |
| Education-years (SD) | .70                  | (1.6)    | 1.50                    | (2.8)  | 3.46                   | (4.0)  | 4.93              | (4.4)  | 96.64***                        |  |
| Urban residence      | 21                   | (18.1)   | 250                     | (26.7) | 546                    | (41.5) | 109               | (50.9) | 89.33***                        |  |
| No. of Males (%)     | 30                   | (25.9)   | 338                     | (36.1) | 738                    | (56.0) | 158               | (73.8) | 166.41***                       |  |
| Hypertension (%)     | 14                   | (12.1)   | 115                     | (12.3) | 179                    | (13.6) | 24                | (11.2) | 1.50                            |  |
| Diabetes (%)         | 1                    | (.9)     | 9                       | (1.0)  | 20                     | (1.5)  | 6                 | (2.8)  | 4.77                            |  |
| Heart Disease (%)    | 2                    | (1.7)    | 39                      | (4.2)  | 86                     | (6.5)  | 14                | (6.5)  | 9.61*                           |  |
| Smoke (%)            | 18                   | (15.5)   | 219                     | (23.4) | 399                    | (30.3) | 64                | (29.9) | 22.14***                        |  |
| Drink (%)            | 32                   | (27.6)   | 214                     | (22.8) | 368                    | (27.9) | 69                | (32.2) | 11.56**                         |  |
| Exercise (%)         | 28                   | (24.1)   | 261                     | (27.9) | 546                    | (41.5) | 122               | (57.0) | 89.80***                        |  |

*Note.* SD = Standard Deviation. MMSE = Mini-Mental State Examination. \* $p < .05$ . \*\* $p < .01$ . \*\*\* $p < .001$ .
